# Supplementary material for: Offline-Channel Planning in Smart Omnichannel Retailing
Source: Atypon-hosted journal article supplement (doi:10.1287/msom.2021.1036), 2021-12-20
Supplement: msom.2021.1036.sm1.pdf [file msom.2021.1036.sm1.pdf]

# E-companion for “Offline-Channel Planning in Smart Omnichannel Retailing”

## EC.1. Proofs of Statements

The proofs are ordered based on their first appearances in the main text.

### EC.1.1. Proof of Proposition 1.

*Proof:* We prove by showing a reduction of the *Uncapacitated Facility Location* (UFL) problem to problem (LA). Because UFL is known to be NP-hard, we have that problem (LA) is NP-hard.

To see the reduction, first note that given  $\mathbf{X}$  and  $\mathbf{Z}$ , the optimal expected revenue  $\mathcal{Q}(\mathbf{X}, \mathbf{Z})$  is decomposable by each  $i \in \mathcal{I}$ . Indeed, define

$$\mathcal{Y}_i(X_i) = \{ \mathbf{Y} \in \{0, 1\}^K \mid \sum_{k \in \mathcal{K}} a_k Y_k \leq c_i X_i \}.$$

Immediately, we have  $\mathcal{Y}_i(0) = \{\mathbf{0}\}$  and  $\mathcal{Y}_i(1) = \{ \mathbf{Y} \in \{0, 1\}^K \mid \sum_{k \in \mathcal{K}} a_k Y_k \leq c_i \}$ . For given  $\mathbf{X}$  and  $\mathbf{Z}$ , the objective of  $\mathcal{Q}(\mathbf{X}, \mathbf{Z})$  can be rewritten as

$$\begin{aligned} \mathcal{Q}(\mathbf{X}, \mathbf{Z}) &= \max_{\mathbf{Y}_i \in \mathcal{Y}_i(X_i), \forall i \in \mathcal{I}} \sum_{j \in \mathcal{J}} \sum_{k \in \mathcal{K}} \sum_{l \in \mathcal{L}} r_k \mu_j \theta_{l|j} \left( \lambda_{0|jl}(\mathbf{Z}) p_{k|0l} + \sum_{i \in \mathcal{I}_j} \lambda_{i|jl}(\mathbf{Z}) p_{k|il}(\mathbf{Y}_i) \right) \\ &= \mathcal{Q}_0(\mathbf{Z}) + \max_{\mathbf{Y}_i \in \mathcal{Y}_i(1), \forall i \in \mathcal{I}(\mathbf{X})} \sum_{j \in \mathcal{J}} \sum_{k \in \mathcal{K}} \sum_{l \in \mathcal{L}} r_k \mu_j \theta_{l|j} \sum_{i \in \mathcal{I}_j \cap \mathcal{I}(\mathbf{X})} \lambda_{i|jl}(\mathbf{Z}) p_{k|il}(\mathbf{Y}_i) \\ &= \mathcal{Q}_0(\mathbf{Z}) + \max_{\mathbf{Y}_i \in \mathcal{Y}_i(1), \forall i \in \mathcal{I}(\mathbf{X})} \sum_{i \in \mathcal{I}(\mathbf{X})} \sum_{k \in \mathcal{K}} \sum_{l \in \mathcal{L}} r_k \left( \sum_{j \in \mathcal{J}: i \in \mathcal{I}_j} \mu_j \theta_{l|j} \lambda_{i|jl}(\mathbf{Z}) \right) p_{k|il}(\mathbf{Y}_i) \\ &= \mathcal{Q}_0(\mathbf{Z}) + \sum_{i \in \mathcal{I}(\mathbf{X})} \max_{\mathbf{Y}_i \in \mathcal{Y}_i(1)} \sum_{k \in \mathcal{K}} \sum_{l \in \mathcal{L}} r_k \hat{\mu}_{il}(\mathbf{Z}) p_{k|il}(\mathbf{Y}_i) \\ &:= \sum_{i \in \mathcal{I}(\mathbf{X}) \cup \{0\}} \mathcal{Q}_i(\mathbf{Z}). \end{aligned}$$

Next, note that each  $\mathcal{Q}_i(\mathbf{Z})$  further reduces to

$$\sum_{j \in \mathcal{J}: i \in \mathcal{I}_j} Z_{ij} \mathcal{Q}_i \mu_j \frac{e^{\beta_i - \alpha_{d_{ij}}}}{1 + e^{\beta_i - \alpha_{d_{ij}}}}$$

when customers are assumed to be homogeneous. Note that  $\mathcal{Q}_i$ 's can be obtained by solving separate optimization problems. Consequently, we have  $\mathcal{Q}(\mathbf{X}, \mathbf{Z}) = \sum_{i \in \mathcal{I}, j \in \mathcal{J}: i \in \mathcal{I}_j} Z_{ij} \mathcal{D}_{ij}$ , where  $\mathcal{D}_{ij} = \mathcal{Q}_i \mu_j e^{\beta_i - \alpha_{d_{ij}}} / (1 + e^{\beta_i - \alpha_{d_{ij}}})$ . Plugging into problem (LA), we obtain a linear objective function consisting of fixed costs of locating facilities and costs associated with virtual travel distances  $\mathcal{D}_{ij}$ . Then, it can be verified that constraint (4) with properly chosen coefficients ensures customer assignments based on proximity. Therefore, any instance of problem (LA) converts into an instance of the UFL problem. Conversely, every UFL instance reduces to an instance of problem (LA) with homogeneous customers with a reverse construction.  $\square$

**EC.1.2. Proof of Proposition 2.**

First by our assumption, a customer from region  $j$  will never visit a store in  $\mathcal{I} \setminus \{i(j)\}$ . Therefore,  $\hat{n}_{ijkl}^t = 0$  if  $i \in \mathcal{I} \setminus \{i(j)\}$ , for all  $t \in \mathcal{T}$ ,  $j \in \mathcal{J}$ ,  $l \in \mathcal{L}$  and  $k \in \bar{\mathcal{K}}$ . Next, given  $\hat{\Omega}$ , we consider the following cases for  $i \in \{0, i(j)\}$ .

**Case A** ( $i = 0$  and  $k \in \mathcal{K}$ ). Fix  $t \in \mathcal{T}$ ,  $j \in \mathcal{J}$  and  $l \in \mathcal{L}$ . For product  $k \in \mathcal{K}$ , we have

$$\begin{aligned} p_{0jkl} &:= \mathbb{P}\{\text{the customer is of class } l \mid \text{a region-}j \text{ online customer purchases } k\} \\ &= \frac{\mathbb{P}\{\text{a region-}j \text{ and class-}l \text{ online customer purchases } k\}}{\mathbb{P}\{\text{a region-}j \text{ online customer purchases } k\}} = \frac{\hat{\mu}_j \hat{\theta}_{l|j} \hat{\lambda}_{0|jl} P_{k|l}(\emptyset, \hat{\mathbf{v}})}{\sum_{l' \in \mathcal{L}} \hat{\mu}_j \hat{\theta}_{l'|j} \hat{\lambda}_{0|jl'} P_{k|l'}(\emptyset, \hat{\mathbf{v}})}, \end{aligned}$$

which yields

$$\hat{n}_{0jkl}^t = \mathbb{E}[n_{0jkl}^t | \mathbf{w}^t] = p_{0jkl} w_{0jk}^t = \frac{\hat{\theta}_{l|j} \hat{\lambda}_{0|jl} P_{k|l}(\emptyset, \hat{\mathbf{v}})}{\sum_{l' \in \mathcal{L}} \hat{\theta}_{l'|j} \hat{\lambda}_{0|jl'} P_{k|l'}(\emptyset, \hat{\mathbf{v}})} w_{0jk}^t.$$

**Case B** ( $i = i(j)$  and  $k \in \mathcal{K}$ ). Fix  $t \in \mathcal{T}$ ,  $j \in \mathcal{J}$  and  $l \in \mathcal{L}$ , and use  $i$  to denote  $i(j)$  for notation brevity. Note that

$$\hat{n}_{ijkl}^t = \mathbb{E}[n_{ijkl}^t | \mathbf{w}^t] = \mathbb{E}[a^t | \mathbf{w}^t] \hat{\mu}_j \hat{\theta}_{l|j} \hat{\lambda}_{i|jl} P_{k|l}(\mathcal{K}, \hat{\mathbf{v}}),$$

and

$$w_{ijk}^t = \mathbb{E}[a^t | \mathbf{w}^t] \hat{\mu}_j \sum_{l' \in \mathcal{L}} \hat{\theta}_{l'|j} \hat{\lambda}_{i|jl'} P_{k|l'}(\mathcal{S}_i^t, \hat{\mathbf{v}}).$$

By eliminating  $\mathbb{E}[a^t | \mathbf{w}^t]$ , we have

$$\hat{n}_{ijkl}^t = \frac{\hat{\theta}_{l|j} \hat{\lambda}_{i|jl} P_{k|l}(\mathcal{K}, \hat{\mathbf{v}})}{\sum_{l' \in \mathcal{L}} \hat{\theta}_{l'|j} \hat{\lambda}_{i|jl'} P_{k|l'}(\mathcal{S}_i^t, \hat{\mathbf{v}})} w_{ijk}^t.$$

**Case C** ( $k = 0$ ). Now we consider the no-purchase option  $k = 0$ . Note that  $\mathbb{E}[a^t | \mathbf{w}^t] = \sum_{i \in \bar{\mathcal{I}}} \sum_{j \in \mathcal{J}} \sum_{k \in \mathcal{K}} \sum_{l \in \mathcal{L}} \hat{n}_{ijkl}^t + \sum_{i \in \bar{\mathcal{I}}} \sum_{j \in \mathcal{J}} \sum_{l \in \mathcal{L}} \hat{n}_{ij0l}^t$ . Note that we have

$$\hat{n}_{0j0l}^t = \hat{\mu}_j \hat{\theta}_{l|j} \hat{\lambda}_{0|jl} P_{0|l}(\emptyset, \hat{\mathbf{v}}) \mathbb{E}[a^t | \mathbf{w}^t], \quad (\text{EC.1})$$

$$\hat{n}_{i(j),j0l}^t = \hat{\mu}_j \hat{\theta}_{l|j} \hat{\lambda}_{i(j)|jl} P_{0|l}(\mathcal{K}, \hat{\mathbf{v}}) \mathbb{E}[a^t | \mathbf{w}^t]. \quad (\text{EC.2})$$

Thus we have

$$\mathbb{E}[a^t | \mathbf{w}^t] = \sum_{i \in \bar{\mathcal{I}}} \sum_{j \in \mathcal{J}} \sum_{k \in \mathcal{K}} \sum_{l \in \mathcal{L}} \hat{n}_{ijkl}^t + \sum_{j \in \mathcal{J}} \sum_{l \in \mathcal{L}} \hat{\mu}_j \hat{\theta}_{l|j} \left( \hat{\lambda}_{0|jl} P_{0|l}(\emptyset, \hat{\mathbf{v}}) + \hat{\lambda}_{i(j)|jl} P_{0|l}(\mathcal{K}, \hat{\mathbf{v}}) \right) \mathbb{E}[a^t | \mathbf{w}^t],$$

$$\begin{aligned} \mathbb{E}[a^t | \mathbf{w}^t] &= \frac{\sum_{i \in \bar{\mathcal{I}}} \sum_{j \in \mathcal{J}} \sum_{k \in \mathcal{K}} \sum_{l \in \mathcal{L}} \hat{n}_{ijkl}^t}{1 - \sum_{j \in \mathcal{J}} \sum_{l \in \mathcal{L}} \hat{\mu}_j \hat{\theta}_{l|j} \left( \hat{\lambda}_{0|jl} P_{0|l}(\emptyset, \hat{\mathbf{v}}) + \hat{\lambda}_{i(j)|jl} P_{0|l}(\mathcal{K}, \hat{\mathbf{v}}) \right)} \\ &= \frac{\sum_{i \in \bar{\mathcal{I}}} \sum_{j \in \mathcal{J}} \sum_{k \in \mathcal{K}} \sum_{l \in \mathcal{L}} \hat{n}_{ijkl}^t}{\sum_{i' \in \bar{\mathcal{I}}} \sum_{j' \in \mathcal{J}} \sum_{l' \in \mathcal{L}} \sum_{k' \in \mathcal{K}} \hat{\mu}_{j'} \hat{\theta}_{l'|j'} \hat{\lambda}_{i'|j'l'} P_{k'|l'}} \end{aligned}$$

Plugging the above equation into (EC.1) and (EC.2) completes the proof.  $\square$

**EC.1.3. Proof of Proposition 3**

Based on the definition of  $\Lambda_t$ , we have

$$\Lambda_t^* = \mathbb{E}[a^t | \mathbf{w}^t] = \sum_{i \in \bar{\mathcal{I}}} \sum_{j \in \mathcal{J}} \sum_{k \in \bar{\mathcal{K}}} \sum_{l \in \mathcal{L}} \hat{n}_{ijkl}^t.$$

As (8) is decomposable,  $\boldsymbol{\mu}^*$ ,  $\boldsymbol{\theta}^*$  and  $\boldsymbol{\lambda}^*$  can be obtained by solving the following problems:

$$\begin{aligned} \boldsymbol{\mu}^* &= \arg \max_{\boldsymbol{\mu} \geq 0} \left\{ \sum_{j \in \mathcal{J}} \left( \sum_{t \in \mathcal{T}} \sum_{i \in \bar{\mathcal{I}}} \sum_{l \in \mathcal{L}} \sum_{k \in \bar{\mathcal{K}}} \hat{n}_{ijkl}^t \right) \ln \mu_j; \sum_{j \in \mathcal{J}} \mu_j = 1 \right\} \\ \boldsymbol{\theta}_j^* &= \arg \max_{\boldsymbol{\theta}_j \geq 0} \left\{ \sum_{l \in \mathcal{L}} \left( \sum_{t \in \mathcal{T}} \sum_{k \in \bar{\mathcal{K}}} \sum_{i \in \bar{\mathcal{I}}} \hat{n}_{ijkl}^t \right) \ln \theta_{l|j}; \sum_{l \in \mathcal{L}} \theta_{l|j} = 1 \right\}, j \in \mathcal{J} \\ \boldsymbol{\lambda}_{\cdot|jl}^* &= \arg \max_{\boldsymbol{\lambda}_{\cdot|jl} \geq 0} \left\{ \sum_{t \in \mathcal{T}} \sum_{i \in \{i(j), 0\}} \sum_{k \in \bar{\mathcal{K}}} \hat{n}_{ijkl}^t \ln \lambda_{i|jl}; \sum_{i \in \{0, i(j)\}} \lambda_{i|jl} = 1, \lambda_{i|jl} = 0 \text{ } i \in \mathcal{I} \setminus \{i(j)\} \right\}, j \in \mathcal{J}, l \in \mathcal{L}, \\ \boldsymbol{v}_{l,\text{on}}^* &= \arg \max_{\boldsymbol{v}_{l,\text{on}} \geq 0} \sum_{k \in \mathcal{K}} \left( \sum_{t=1}^T \sum_{j \in \mathcal{J}} \hat{n}_{0jkl}^t \right) \ln v_{kl,\text{on}} - \sum_{k \in \bar{\mathcal{K}}} \left( \sum_{t=1}^T \sum_{j \in \mathcal{J}} \hat{n}_{0jkl}^t \right) \ln \left( 1 + \sum_{k' \in \mathcal{K}} v_{k'l,\text{on}} \right), l \in \mathcal{L} \\ \boldsymbol{v}_{l,\text{off}}^* &= \arg \max_{\boldsymbol{v}_{l,\text{off}} \geq 0} \sum_{k \in \mathcal{K}} \left( \sum_{t \in \mathcal{T}} \sum_{i \in \mathcal{I}} \sum_{j \in \mathcal{J}} \hat{n}_{ijkl}^t \right) \ln v_{kl,\text{off}} - \sum_{k \in \bar{\mathcal{K}}} \left( \sum_{t \in \mathcal{T}} \sum_{i \in \mathcal{I}} \sum_{j \in \mathcal{J}} \hat{n}_{ijkl}^t \right) \ln \left( 1 + \sum_{k' \in \mathcal{K}} v_{k'l,\text{off}} \right), l \in \mathcal{L} \end{aligned}$$

which have closed-form solutions given by

$$\begin{aligned} \mu_j^* &= \frac{\sum_{t \in \mathcal{T}} \sum_{i \in \bar{\mathcal{I}}} \sum_{l \in \mathcal{L}} \sum_{k \in \bar{\mathcal{K}}} \hat{n}_{ijkl}^t}{\sum_{j' \in \mathcal{J}} \sum_{t \in \mathcal{T}} \sum_{i \in \bar{\mathcal{I}}} \sum_{l \in \mathcal{L}} \sum_{k \in \bar{\mathcal{K}}} \hat{n}_{ij'kl}^t}, j \in \mathcal{J} \\ \theta_{l|j}^* &= \frac{\sum_{t \in \mathcal{T}} \sum_{k \in \bar{\mathcal{K}}} \sum_{i \in \bar{\mathcal{I}}} \hat{n}_{ijkl}^t}{\sum_{l' \in \mathcal{L}} \sum_{t \in \mathcal{T}} \sum_{k \in \bar{\mathcal{K}}} \sum_{i \in \bar{\mathcal{I}}} \hat{n}_{ijkl'}^t}, l \in \mathcal{L}, j \in \mathcal{J} \\ \lambda_{i|jl}^* &= \begin{cases} \frac{\sum_{t \in \mathcal{T}} \sum_{k \in \bar{\mathcal{K}}} \hat{n}_{ijkl}^t}{\sum_{t \in \mathcal{T}} \sum_{i' \in \bar{\mathcal{I}}} \sum_{k \in \bar{\mathcal{K}}} \hat{n}_{i'jkl}^t} & i \in \{0, i(j)\}, \\ 0 & i \in \mathcal{I} \setminus \{i(j)\}, \end{cases} j \in \mathcal{J}, l \in \mathcal{L} \\ v_{kl,\text{on}}^* &= \frac{\sum_{t \in \mathcal{T}} \sum_{j \in \mathcal{J}} \hat{n}_{0jkl}^t}{\sum_{t \in \mathcal{T}} \sum_{j \in \mathcal{J}} \hat{n}_{0j0l}^t}, k \in \mathcal{K}, l \in \mathcal{L} \\ v_{kl,\text{off}}^* &= \frac{\sum_{t \in \mathcal{T}} \sum_{i \in \mathcal{I}} \sum_{j \in \mathcal{J}} \hat{n}_{ijkl}^t}{\sum_{t \in \mathcal{T}} \sum_{i \in \mathcal{I}} \sum_{j \in \mathcal{J}} \hat{n}_{ij0l}^t}, k \in \mathcal{K}, l \in \mathcal{L}. \end{aligned}$$

Thus we finish the proof.  $\square$

**EC.1.4. Proof of Lemma 1.**

*Proof:* Note that (i) for any fixed  $j$  and  $l$ , because there is up to one  $i \in \mathcal{I}_j$  such that  $Z_{ij} = 1$  (due to constraints (4)), then we have  $\lambda_{i|jl}(\mathbf{Z}) = \hat{\lambda}_{i|jl} Z_{ij}$ , for all  $i \in \mathcal{I}_j$ , and (ii)  $e^{u_{kl} + \delta_{kl} Y_{ik}} = e^{u_{kl}} Y_{ik,\text{on}} + e^{u_{kl} + \delta_{kl}} Y_{ik,\text{off}}$  by constraints (11) and (12). Therefore, the objective function of problem (LA) is equal to

$$\sum_{i \in \mathcal{I}} f_i X_i - \sum_{j \in \mathcal{J}} \sum_{k \in \mathcal{K}} \sum_{l \in \mathcal{L}} r_k \mu_j \theta_{l|j} \left( \lambda_{0|jl}(\mathbf{Z}) p_{k|0l} + \sum_{i \in \mathcal{I}_j} \lambda_{i|jl}(\mathbf{Z}) p_{k|il}(\mathbf{Y}_i) \right)$$

$$\begin{aligned}
&= \sum_{i \in \mathcal{I}} f_i X_i - \sum_{j \in \mathcal{J}} \sum_{l \in \mathcal{L}} \mu_j \theta_{l|j} \left( \lambda_{0|jl}(\mathbf{Z}) \frac{\sum_{k \in \mathcal{K}} r_k e^{u_{kl}}}{1 + \sum_{k \in \mathcal{K}} e^{u_{kl}}} + \sum_{i \in \mathcal{I}_j} \lambda_{i|jl}(\mathbf{Z}) \frac{\sum_{k \in \mathcal{K}} r_k e^{u_{kl} + \delta_{kl} Y_{ik}}}{1 + \sum_{k \in \mathcal{K}} e^{u_{kl} + \delta_{kl} Y_{ik}}} \right) \\
&= \sum_{i \in \mathcal{I}} f_i X_i - \bar{r} \sum_{j \in \mathcal{J}} \mu_j \\
&\quad + \sum_{j \in \mathcal{J}} \sum_{l \in \mathcal{L}} \mu_j \theta_{l|j} \left( \lambda_{0|jl}(\mathbf{Z}) \frac{\bar{r} + \sum_{k \in \mathcal{K}} (\bar{r} - r_k) e^{u_{kl}}}{1 + \sum_{k \in \mathcal{K}} e^{u_{kl}}} + \sum_{i \in \mathcal{I}_j} \lambda_{i|jl}(\mathbf{Z}) \frac{\bar{r} + \sum_{k \in \mathcal{K}} (\bar{r} - r_k) e^{u_{kl} + \delta_{kl} Y_{ik}}}{1 + \sum_{k \in \mathcal{K}} e^{u_{kl} + \delta_{kl} Y_{ik}}} \right) \\
&= \sum_{i \in \mathcal{I}} f_i X_i - \bar{r} \sum_{j \in \mathcal{J}} \mu_j \\
&\quad + \sum_{j \in \mathcal{J}} \sum_{l \in \mathcal{L}} \mu_j \theta_{l|j} \left( \left( 1 - \sum_{i \in \mathcal{I}_j} \hat{\lambda}_{i|jl} Z_{ij} \right) R_{0l} + \sum_{i \in \mathcal{I}_j} \hat{\lambda}_{i|jl} Z_{ij} \frac{\bar{r} + \sum_{k \in \mathcal{K}} (\bar{r} - r_k) \sum_{c \in \mathcal{C}} v_{kl,c} Y_{ik,c}}{1 + \sum_{k \in \mathcal{K}} \sum_{c \in \mathcal{C}} v_{kl,c} Y_{ik,c}} \right).
\end{aligned}$$

Dropping the constant term  $-\bar{r} \sum_{j \in \mathcal{J}} \mu_j + \sum_{j \in \mathcal{J}} \sum_{l \in \mathcal{L}} \mu_j \theta_{l|j} R_{0l}$  in the above expression leads to the equivalent objective function (10).  $\square$

#### EC.1.5. Proof of Proposition 4.

*Proof:* Omitted.  $\square$

#### EC.1.6. Proof of Proposition 5.

*Proof:* Note that

$$R_{ij}(\mathbf{Y}_i) = \bar{r} \sum_{l \in \mathcal{L}} \theta_{l|j} \hat{\lambda}_{i|jl} - \sum_{l \in \mathcal{L}} \theta_{l|j} \hat{\lambda}_{i|jl} \frac{\sum_{k \in \mathcal{K}} \sum_{c \in \mathcal{C}} r_k v_{kl,c} Y_{ik,c}}{1 + \sum_{k \in \mathcal{K}} \sum_{c \in \mathcal{C}} v_{kl,c} Y_{ik,c}}.$$

Along the same line of derivation of the reformulation (**LA-MISOCP**) as in Section 5.1, we have (19) and (20). This completes the proof.  $\square$

#### EC.1.7. Proof of Proposition 6

*Proof:* Fix a permutation  $\boldsymbol{\pi}$ , it is evident that for any  $n \in \{1, 2, \dots, 2K\}$ , we have  $\hat{\sigma}_{\pi_n} \geq \sigma_{\pi_n}$ . Then, by noting that  $\sqrt{\cdot}$  defines a polymatroid function, we obtain that  $\hat{\rho}_{\pi_n} \leq \rho_{\pi_n}$  for all  $n \in \{1, 2, \dots, 2K\}$ . Consequently, any  $(\mathbf{y}, z)$  satisfying inequality (26) must also satisfy inequality (27). Then, the result follows from the validity of inequality (26) (proved in Atamtürk and Gómez (2020)).  $\square$

#### EC.1.8. Proof of Proposition 7.

*Proof:* Subsuming the notation  $\hat{b}_1, \dots, \hat{b}_{2K}$  and  $\hat{c}$  as defined in the proposition's statement, we can re-express  $\hat{\sigma}_{\pi_n}$  as the following LP:

$$\hat{\sigma}_{\pi_n} = b_0 + \max_{\mathbf{y} \geq 0} \sum_{s=1}^{2K} \hat{b}_s y_s$$

$$\begin{aligned} \text{s.t. } y_{2k-1} + y_{2k} &= 1 \quad \forall k \in \mathcal{K} \setminus \{n^\circ\} \\ \sum_{k \in \mathcal{K} \setminus \{n^\circ\}} a_k y_{2k} &\leq \widehat{c}. \end{aligned}$$

This is because notation  $\widehat{b}_1, \dots, \widehat{b}_{2K}$  is defined in a way that allows the use of the same lower and upper limits of summation for all  $n$ . By the strong duality, we have

$$\begin{aligned} \widehat{\sigma}_{\pi_n} = b_0 + \min_{\mathbf{u} \in \mathbb{R}^K, v \geq 0} \left\{ \widehat{c}v + \sum_{k \in \mathcal{K} \setminus \{n^\circ\}} u_k \right\} \\ \text{s.t. } u_k \geq \widehat{b}_{2k-1} \quad \forall k \in \mathcal{K} \setminus \{n^\circ\} \end{aligned} \quad (\text{EC.3})$$

$$u_k + a_k v \geq \widehat{b}_{2k} \quad \forall k \in \mathcal{K} \setminus \{n^\circ\}. \quad (\text{EC.4})$$

Note that constraints (EC.3) and (EC.4) imply that  $u_k = \max\{\widehat{b}_{2k-1}, \widehat{b}_{2k} - a_k v\}$  for all  $k \in \mathcal{K} \setminus \{n^\circ\}$ . Then, it can be verified that  $u_k = \widehat{b}_{2k-1}$  for all  $k \in \widehat{\mathcal{K}}^-$ . Consequently, we have

$$\widehat{\sigma}_{\pi_n} = b_0 + \sum_{k \in \widehat{\mathcal{K}}^-} \widehat{b}_{2k-1} + \min_{v \geq 0} f(v), \quad (\text{EC.5})$$

where  $f(v) := \widehat{c}v + \sum_{k \in \widehat{\mathcal{K}}^+} \max\{\widehat{b}_{2k-1}, \widehat{b}_{2k} - a_k v\}$ .

We now study the monotonicity of  $f(v)$ . Notice that  $f(v)$  is a univariate piece-wise linear function, of which the derivative  $f'(v)$  satisfies

$$f'(v) = \widehat{c} - \sum_{t'=t}^{|\widehat{\mathcal{K}}^+|} a_{\widehat{\pi}_{t'}}, \quad \forall v \in (v_{t-1}, v_t), \quad t = 1, 2, \dots, |\widehat{\mathcal{K}}^+|, \quad (\text{EC.6})$$

where  $v_0 = 0$  and  $v_t = (\widehat{b}_{2\widehat{\pi}_t} - \widehat{b}_{2\widehat{\pi}_t-1})/a_{\widehat{\pi}_t}$  for  $t = 1, 2, \dots, |\widehat{\mathcal{K}}^+|$ . By the definition of  $t^*$  and (EC.6), we obtain that  $f(v)$  takes its minimum at  $v_{t^*}$ , that is,  $\min_{v \geq 0} f(v) = f(v_{t^*})$ . Then, equation (EC.5) yields (29), and this completes the proof.  $\square$

## EC.2. Algorithms

Here, we present two additional algorithms to improve the performance of the proposed parameter estimation approach. In particular, Algorithm 1 performs model selection by determining the optimal number of latent classes, whereas Algorithm 2 provides an initialization approach that can increase the computational efficiency of the EM algorithm.

## EC.3. Related Concepts

Conic programming problems are optimization problems with linear objective functions and conic constraints. A second-order conic constraint on decision variables  $\mathbf{x} \in \mathbb{R}^n$  is of the form

$$\|\mathbf{A}\mathbf{x} - \mathbf{b}\| \leq \mathbf{c}^T \mathbf{x} - d,$$

---

**Algorithm 1** Procedure for model selection

---

**Input**  $\mathcal{J}, \mathcal{K}$ , Data  $\mathcal{N}$ , convergence level  $\epsilon$ .**Output** Latent class index set  $\mathcal{L}$ , parameter set  $\Omega$ .Set  $\mathcal{L} = \emptyset$ ,  $\text{AIC}^0 = \infty$ .**while**  $\text{AIC}^{|\mathcal{L}|} < \text{AIC}^{|\mathcal{L}|-1}$  **do**Set  $\mathcal{L} = \mathcal{L} \cup \{|\mathcal{L}| + 1\}$ **EM Procedure:** Apply Algorithm 1 and obtain  $\hat{\Omega}$  and  $\ln \mathcal{L}_I(\hat{\Omega})$ .**Compute AIC:**  $\text{AIC}^{|\mathcal{L}|} = -2 \ln \mathcal{L}_I(\hat{\Omega}) + 2|\hat{\Omega}|$ .**end while**

---

---

**Algorithm 2** Procedure for an initial solution

---

**Input:**  $\mathcal{J}, \mathcal{L}, \mathcal{K}$ , Data  $\mathcal{N}$ , constant  $\gamma$ **Output:**  $\Omega^0 = (\mathbf{\Lambda}^0, \boldsymbol{\lambda}^0, \boldsymbol{\mu}^0, \boldsymbol{\theta}^0, \mathbf{v}^0)$ **for**  $i \in \mathcal{I} \cup \{0\}$  **do****for**  $1 \leq t \leq T$  **do**Randomly select  $\hat{n}_{ijkl}^t$  from  $[0, w_{ijk}^t]$  with  $\sum_{l \in \mathcal{L}} \hat{n}_{ijkl}^t = w_{ijk}^t$ .Initialize  $\hat{n}_{ij0l}^t = 0$  for  $j \in \mathcal{J}, l \in \mathcal{L}$ .Randomly select  $\text{NonPurchase} > 0$ **for**  $1 \leq r \leq \text{NonPurchase}$  **do**Randomly select  $n$  from  $1 \dots |\mathcal{L}|$ Randomly select  $m$  from  $1 \dots |\mathcal{J}|$ Draw  $u \sim \text{unif}(0, 1)$ **if**  $u < \gamma$  **then**Set  $\hat{n}_{im0n}^t = 1$ **end if****end for**Ensure  $\sum_{j \in \mathcal{J}} \hat{n}_{ij0l}^t > 0$  for each  $l \in \mathcal{L}$ .**end for****end for**Set  $\Omega^0 = (\mathbf{\Lambda}^0, \boldsymbol{\lambda}^0, \boldsymbol{\mu}^0, \boldsymbol{\theta}^0, \mathbf{v}^0)$  by Proposition 3.

---

where  $\|\cdot\|$  is the Euclidean norm,  $\mathbf{A} \in \mathbb{R}^{m \times n}$ ,  $\mathbf{b} \in \mathbb{R}^m$ ,  $\mathbf{c} \in \mathbb{R}^n$  and  $d \in \mathbb{R}$  are parameters. Conic programming problems have been shown to be polynomial time solvable (see for example, primal-dual interior point methods). Furthermore, recent advances in solution methods and software packages have greatly enhanced the solvability of mixed-integer conic problems.

Our reformulation approach is closely related to a special case of second-order conic inequalities, which is the following *rotated cone/hyperbolic inequality*:

$$x_1x_2 \geq x_3^2, \tag{EC.7}$$

where  $x_1, x_2, x_3 \geq 0$ . It can be shown that the rotated-cone constraint (EC.7) is equivalent to the following second-order conic inequality:

$$\|(x_1 - x_2, 2x_3)\| \leq x_1 + x_2.$$

To facilitate the discussion on strengthening cuts, we review the definition of polymatroid functions. Let  $\vee$  and  $\wedge$  denote the componentwise maximum and minimum of two vectors, respectively, that is, for  $\mathbf{x}, \mathbf{y} \in \mathbb{R}^n$   $\mathbf{x} \vee \mathbf{y} = \inf\{\mathbf{z} \in \mathbb{R}^n | z_i \geq x_i, z_i \geq y_i, \forall i = \{1, 2, \dots, n\}\}$ , and  $\mathbf{x} \wedge \mathbf{y} = \sup\{\mathbf{z} \in \mathbb{R}^n | z_i \leq x_i, z_i \leq y_i, \forall i = \{1, 2, \dots, n\}\}$ . A real-valued function  $f$  defined on  $\{0, 1\}^n$  is a polymatroid function if it is normalized ( $f(\mathbf{0}) = 0$ ), non-decreasing ( $f(\mathbf{y}_1) \leq f(\mathbf{y}_2)$  for  $\mathbf{y}_1 \leq \mathbf{y}_2$  and  $\mathbf{y}_1, \mathbf{y}_2 \in \{0, 1\}^n$ ), and submodular, that is

$$f(\mathbf{y}_1 \vee \mathbf{y}_2) + f(\mathbf{y}_1 \wedge \mathbf{y}_2) \leq f(\mathbf{y}_1) + f(\mathbf{y}_2), \quad \forall \mathbf{y}_1, \mathbf{y}_2 \in \{0, 1\}^n.$$

## References

- Atamtürk A, Gómez A (2020) Submodularity in conic quadratic mixed 0–1 optimization. *Oper. Res.* 68(2):609–630.
